# Supplementary material for: Associations between gut microbiota and genetic risk for rheumatoid arthritis in the absence of disease: a cross-sectional study
Source: PubMed Central journal article supplement (PMC7729822; doi:10.1016/s2665-9913(20)30064-3), 2020-06-25
Supplement: mmc1.pdf [file mmc1.pdf]

# THE LANCET

## Rheumatology

### Supplementary appendix

This appendix formed part of the original submission and has been peer reviewed.  
We post it as supplied by the authors.

Supplement to: Wells PM, Adebayo AS, Bowyer RCE, et al. Associations between gut microbiota and genetic risk for rheumatoid arthritis in the absence of disease: a cross-sectional study. *Lancet Rheumatol* 2020; **2**: e418–27.

## Supplementary Material

### Supplementary Methods

|                        | SE Positive<br>(n=74) | SE Negative<br>(n=55) | T Test |
|------------------------|-----------------------|-----------------------|--------|
| <b>Age</b>             |                       |                       |        |
| Median (IQR)           | 56.5 (12.75)          | 57 (18.5)             | 0.69   |
| <b>Female Sex</b>      |                       |                       |        |
| n (%)                  | 62 (84)               | 47 (85.5)             | 0.79   |
| <b>BMI</b>             |                       |                       |        |
| Median (IQR)           | 24.5 (4.8)            | 24.4 (4.22)           | 0.47   |
| <b>ACPA positivity</b> |                       |                       |        |
| n (%)                  | 20 (27)               | 16 (29)               | 0.79   |

**Supplementary Table 1.** Age, sex, BMI and ACPA positivity in Shared Epitope (SE) positive and SE negative groups in the SCREEN-RA cohort. These factors were not significantly different between the case (SE positive) and control (SE negative) groups, and may therefore be described as statistically balanced.

#### **Resilience hypothesis: abundance of *Prevotella spp.* in RA discordant twin pairs in TwinsUK cohort.**

To be confident that the *Prevotella spp.* findings in non-RA individuals with genetic risk for RA were not reflecting a “resilience-associated” microbiota (i.e. protective factors against developing disease despite having high genetic risk), we calculated the abundance of these species in 19 monozygotic RA discordant female twin pairs from TwinsUK, which had been excluded from the previous analysis because of the presence of disease. If associated with resilience we would expect the *Prevotella spp.* to be preferentially expressed in the unaffected twin of each discordant pair. RA diagnosis had been confirmed during a clinical visit to a Rheumatologist or RA-trained research assistant. ASVs were generated as above and relative abundance of *Prevotella spp.* in RA discordant twin pairs calculated using the Phyloseq R package<sup>19</sup> (**Supplementary Figure 1**).

## Supplementary Results

| Alpha diversity | Estimate | Std. Error | R <sup>2</sup> | P    |
|-----------------|----------|------------|----------------|------|
| Observed        | -0.011   | 0.021      | 0.251          | 0.6  |
| Shannon         | -0.007   | 0.024      | 0.026          | 0.76 |
| Simpson         | -0.023   | 0.034      | 0.006          | 0.41 |
| Faith's         | -0.009   | 0.021      | 0.116          | 0.65 |

**Supplementary Table 2.** Association of the RA PRS with alpha (within sample) diversity of the gut microbiota in TwinsUK participants. An association of RA PRS with alpha diversity was not demonstrated.

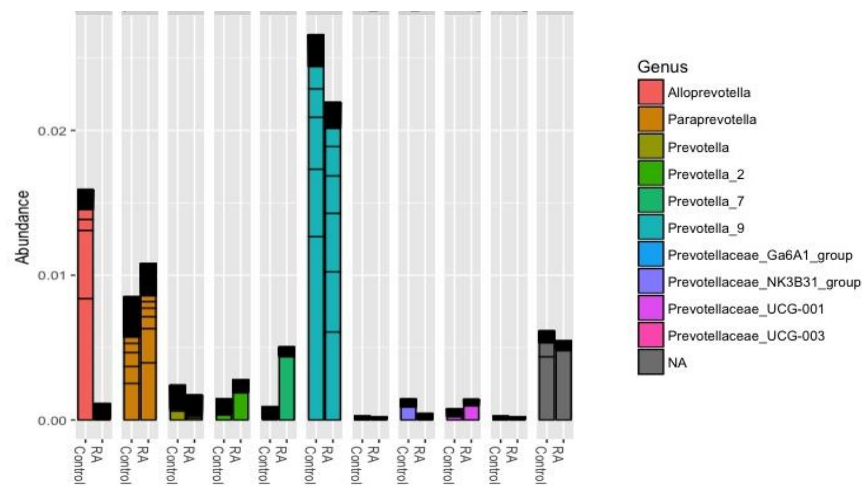

**Supplementary Figure 1.** Relative abundance of *Prevotella spp.* in 30 RA-discordant twin pairs from TwinsUK (total n = 60). The RA affected participants comprising 1 member of each twin pair were established (long-term treated) RA patients. *Prevotella\_7* was more abundant in RA affected co-twins, compared to non-RA co-twins. No statistically significant differences in abundance of *Prevotella spp.* between RA discordant twin pairs were demonstrated.

Supplementary Table 1. SNPs included in the RA PRS.

| Chromosome | SNP        | A1 | A2 | P        | OR    | Replicated |
|------------|------------|----|----|----------|-------|------------|
| 1          | rs624988   | T  | C  | 8.00E-10 | 1.09  | No         |
| 1          | rs840016   | C  | T  | 2.00E-06 | 1.11  | No         |
| 1          | rs923880   | C  | T  | 8.00E-06 | 0.25  | No         |
| 1          | rs72717009 | T  | C  | 5.00E-07 | 1.12  | Yes        |
| 1          | rs2317230  | T  | G  | 2.00E-07 | 1.07  | No         |
| 1          | rs6593803  | T  | C  | 2.00E-07 | 3.13  | No         |
| 1          | rs2228145  | A  | C  | 4.00E-09 | 1.08  | Yes        |
| 1          | rs12565755 | C  | T  | 5.00E-08 | 0.39  | No         |
| 1          | rs2105325  | C  | A  | 0        | 1.12  | Yes        |
| 1          | rs12140275 | A  | T  | 4.00E-09 | 1.11  | Yes        |
| 1          | rs3890745  | T  | C  | 1.00E-07 | 0.89  | Yes        |
| 1          | rs28411352 | T  | C  | 0        | 1.11  | Yes        |
| 1          | rs2301888  | G  | A  | 0        | 1.19  | Yes        |
| 1          | rs12131057 | G  | A  | 4.00E-07 | 1.16  | No         |
| 1          | rs2476601  | A  | G  | 2.00E-11 | 1.72  | Yes        |
| 1          | rs6679677  | A  | C  | 0        | 1.79  | Yes        |
| 1          | rs11121380 | C  | A  | 5.00E-08 | 11.11 | No         |
| 1          | rs998731   | C  | T  | 3.00E-09 | 1.11  | Yes        |
| 2          | rs6732565  | A  | G  | 9.00E-09 | 1.1   | Yes        |
| 2          | rs11676922 | T  | A  | 0        | 1.12  | Yes        |
| 2          | rs10865035 | A  | G  | 2.00E-06 | 1.12  | No         |
| 2          | rs9653442  | C  | T  | 0        | 1.11  | Yes        |
| 2          | rs11900673 | T  | C  | 1.00E-08 | 1.11  | No         |
| 2          | rs13385025 | A  | G  | 9.00E-07 | 1.11  | No         |
| 2          | rs6715284  | G  | C  | 3.00E-09 | 1.15  | Yes        |
| 2          | rs1980422  | C  | T  | 0        | 1.12  | Yes        |
| 2          | rs3087243  | G  | A  | 1.00E-08 | 1.15  | Yes        |
| 2          | rs231735   | G  | T  | 6.00E-09 | 1.17  | No         |
| 2          | rs12617656 | T  | C  | 0        | 1.557 | Yes        |
| 2          | rs41005    | T  | C  | 4.00E-06 | 0.27  | No         |
| 2          | rs1406428  | T  | C  | 2.00E-07 | 2.74  | No         |
| 2          | rs10175798 | A  | G  | 1.00E-09 | 1.08  | Yes        |
| 2          | rs13031237 | T  | G  | 8.00E-07 | 1.13  | No         |
| 2          | rs13017599 | A  | G  | 0        | 1.21  | No         |
| 2          | rs34695944 | C  | T  | 0        | 1.13  | Yes        |
| 2          | rs4305317  | T  | A  | 2.00E-06 | 1.45  | No         |
| 2          | rs13015080 | A  | G  | 3.00E-06 | 0.28  | Yes        |
| 2          | rs934734   | G  | A  | 5.00E-10 | 1.13  | Yes        |
| 2          | rs1858037  | T  | A  | 0        | 1.11  | Yes        |
| 2          | rs7574865  | T  | G  | 2.00E-06 | 1.17  | Yes        |
| 2          | rs11889341 | T  | C  | 0        | 1.13  | Yes        |
| 3          | rs73081554 | T  | C  | 5.00E-08 | 1.18  | No         |
| 3          | rs2062583  | G  | T  | 2.00E-06 | 0.63  | No         |
| 3          | rs9860428  | C  | A  | 4.00E-07 | 1.6   | Yes        |
| 3          | rs3806624  | G  | A  | 9.00E-09 | 1.08  | Yes        |

|   |            |   |   |          |           |     |
|---|------------|---|---|----------|-----------|-----|
| 3 | rs9826828  | A | G | 9.00E-10 | 1.44      | No  |
| 3 | rs6774280  | C | T | 9.00E-07 | 5.5       | No  |
| 3 | rs4452313  | T | A | 5.00E-11 | 1.11      | Yes |
| 3 | rs7624766  | G | A | 4.00E-07 | 2.28      | No  |
| 3 | rs13315591 | C | T | 5.00E-08 | 1.29      | No  |
| 3 | rs1809529  | C | T | 3.00E-07 | 0.28      | No  |
| 4 | rs2867461  | A | G | 0        | 1.13      | No  |
| 4 | rs11933540 | C | T | 0        | 1.15      | No  |
| 4 | rs13142500 | C | T | 2.00E-06 | 1.1       | Yes |
| 4 | rs13119723 | A | G | 7.00E-07 | 1.12      | No  |
| 4 | rs45475795 | G | A | 4.00E-06 | 1.14      | No  |
| 4 | rs11937061 | T | G | 2.00E-07 | 6.7       | No  |
| 4 | rs3816587  | C | T | 9.00E-06 | 1.09      | No  |
| 4 | rs874040   | C | G | 0        | 1.19      | No  |
| 4 | rs6448432  | A | G | 4.00E-07 | 1.19      | No  |
| 4 | rs13137105 | G | A | 9.00E-07 | 6.39      | No  |
| 4 | rs2664035  | A | G | 3.00E-08 | 1.08      | Yes |
| 5 | rs7731626  | G | A | 0        | 1.21      | No  |
| 5 | rs255758   | C | A | 7.00E-06 | 1.42      | No  |
| 5 | rs26232    | C | T | 4.00E-08 | 0.88      | No  |
| 5 | rs2561477  | G | A | 2.00E-11 | 1.11      | Yes |
| 5 | rs1498103  | A | T | 6.00E-06 | 0.26      | No  |
| 5 | rs12519788 | G | A | 5.00E-08 | 1.82      | Yes |
| 5 | rs657075   | A | G | 3.00E-10 | 1.12      | Yes |
| 5 | rs6859219  | C | A | 1.00E-11 | 1.28      | No  |
| 5 | rs12109285 | C | T | 1.00E-07 | 130.2     | No  |
| 5 | rs1502644  | C | A | 1.00E-08 | 2.33      | No  |
| 5 | rs4336372  | C | T | 1.00E-06 | 0.65      | Yes |
| 5 | rs4921283  | A | G | 1.00E-07 | 1.0752687 | No  |
| 6 | rs6568431  | A | C | 1.00E-07 | 1.14      | No  |
| 6 | rs9372120  | G | T | 8.00E-10 | 1.11      | Yes |
| 6 | rs3093024  | A | G | 0        | 1.19      | No  |
| 6 | rs3093023  | A | G | 2.00E-11 | 1.11      | Yes |
| 6 | rs1571878  | C | T | 0        | 1.17      | Yes |
| 6 | rs1854853  | A | G | 0        | 1.4164    | Yes |
| 6 | rs12529514 | C | T | 2.00E-08 | 1.14      | No  |
| 6 | rs3763309  | A | C | 0        | 2.3       | No  |
| 6 | rs6457617  | T | C | 1.00E-09 | 2.36      | Yes |
| 6 | rs9275406  | T | G | 0        | 2.1       | No  |
| 6 | rs660895   | G | A | 0        | 3.62      | No  |
| 6 | rs7765379  | G | T | 0        | 2.51      | No  |
| 6 | rs13192471 | G | A | 0        | 1.97      | No  |
| 6 | rs6910071  | G | A | 0        | 2.88      | No  |
| 6 | rs9378815  | C | G | 2.00E-10 | 1.09      | Yes |
| 6 | rs284515   | G | A | 7.00E-07 | 0.35      | No  |
| 6 | rs284511   | C | T | 3.00E-08 | 0.41      | No  |
| 6 | rs2233434  | G | A | 0        | 1.19      | Yes |

|    |            |   |   |          |       |     |
|----|------------|---|---|----------|-------|-----|
| 6  | rs2233424  | T | C | 0        | 1.24  | Yes |
| 6  | rs9373594  | T | C | 3.00E-09 | 1.09  | Yes |
| 6  | rs2451258  | T | C | 3.00E-11 | 1.1   | Yes |
| 6  | rs6920220  | A | G | 0        | 1.22  | Yes |
| 6  | rs5029924  | T | C | 0        | 1.74  | No  |
| 6  | rs7752903  | G | T | 0        | 1.38  | Yes |
| 6  | rs10499194 | C | T | 1.00E-09 | 1.33  | No  |
| 6  | rs2230926  | C | A | 2.00E-06 | 1.31  | No  |
| 6  | rs75908454 | C | T | 6.00E-07 | 0.42  | No  |
| 7  | rs42041    | G | C | 4.00E-06 | 1.11  | No  |
| 7  | rs4272     | G | A | 5.00E-09 | 1.1   | Yes |
| 7  | rs6956740  | T | C | 5.00E-07 | 3.49  | No  |
| 7  | rs11761231 | T | C | 4.00E-07 | 1.44  | No  |
| 7  | rs10488631 | C | T | 4.00E-11 | 1.16  | No  |
| 7  | rs3807306  | T | G | 3.00E-07 | 1.44  | No  |
| 7  | rs67250450 | T | C | 3.00E-09 | 1.11  | Yes |
| 7  | rs12531711 | G | A | 0        | 1.45  | No  |
| 8  | rs1600249  | T | A | 5.00E-06 | 0.77  | No  |
| 8  | rs2736340  | T | C | 1.00E-11 | 1.21  | Yes |
| 8  | rs2736337  | C | T | 0        | 1.11  | Yes |
| 8  | rs678347   | G | A | 7.00E-09 | 1.1   | Yes |
| 8  | rs16938910 | T | C | 4.00E-07 | 28.66 | No  |
| 8  | rs800586   | A | G | 2.00E-07 | 9.78  | No  |
| 8  | rs1516971  | T | C | 3.00E-11 | 1.16  | Yes |
| 9  | rs11574914 | A | G | 0        | 1.13  | Yes |
| 9  | rs2812378  | G | A | 3.00E-08 | 1.12  | No  |
| 9  | rs951005   | A | G | 4.00E-10 | 1.19  | No  |
| 9  | rs12379034 | G | A | 0        | 1.489 | Yes |
| 9  | rs1329568  | T | G | 8.00E-07 | 19.64 | No  |
| 9  | rs9299346  | A | G | 2.00E-06 | 2.76  | No  |
| 9  | rs2072438  | T | C | 3.00E-09 | 1.142 | No  |
| 9  | rs3761847  | G | A | 0        | 1.32  | Yes |
| 9  | rs10985070 | C | A | 5.00E-11 | 1.08  | Yes |
| 10 | rs10821944 | G | T | 0        | 1.16  | No  |
| 10 | rs71508903 | T | C | 0        | 1.16  | Yes |
| 10 | rs3824660  | C | T | 3.00E-09 | 1.1   | Yes |
| 10 | rs1679568  | A | G | 8.00E-07 | 0.35  | Yes |
| 10 | rs706778   | T | C | 1.00E-11 | 1.14  | Yes |
| 10 | rs2104286  | C | T | 1.00E-06 | 1.19  | No  |
| 10 | rs12413578 | C | T | 8.00E-08 | 1.2   | Yes |
| 10 | rs16906916 | C | A | 8.00E-07 | 14    | No  |
| 10 | rs12570744 | T | C | 2.00E-07 | 0.49  | No  |
| 10 | rs4750316  | G | C | 4.00E-06 | 0.91  | Yes |
| 10 | rs947474   | A | G | 3.00E-10 | 1.12  | Yes |
| 10 | rs3125734  | T | C | 5.00E-09 | 1.2   | No  |
| 10 | rs6479800  | C | G | 4.00E-08 | 1.11  | Yes |
| 10 | rs726288   | T | C | 9.00E-09 | 1.22  | No  |

|    |            |   |   |          |          |     |
|----|------------|---|---|----------|----------|-----|
| 10 | rs2671692  | A | G | 3.00E-09 | 1.07     | No  |
| 10 | rs793108   | T | C | 1.00E-09 | 1.08     | Yes |
| 11 | rs508970   | A | G | 3.00E-06 | 1.07     | No  |
| 11 | rs4409785  | C | T | 1.00E-11 | 1.12     | Yes |
| 11 | rs10790268 | G | A | 0        | 1.17     | Yes |
| 11 | rs73013527 | C | T | 1.00E-10 | 1.09     | Yes |
| 11 | rs4937362  | T | C | 8.00E-07 | 1.09     | No  |
| 11 | rs968567   | C | T | 2.00E-08 | 1.12     | No  |
| 11 | rs518167   | A | G | 2.00E-06 | 2.24     | No  |
| 11 | rs7940423  | A | G | 1.00E-07 | 10.9     | No  |
| 11 | rs72991    | C | T | 5.00E-07 | 2.45     | No  |
| 11 | rs1079467  | C | G | 2.00E-06 | 0.29     | No  |
| 11 | rs3781913  | T | G | 6.00E-10 | 1.12     | No  |
| 11 | rs331463   | T | A | 1.00E-07 | 1.12     | Yes |
| 12 | rs773125   | A | G | 1.00E-10 | 1.09     | Yes |
| 12 | rs1633360  | T | C | 7.00E-08 | 1.08     | Yes |
| 12 | rs11051970 | T | G | 1.00E-06 | 2.08     | No  |
| 12 | rs1678542  | C | G | 1.00E-07 | 1.2      | Yes |
| 12 | rs11045392 | C | T | 2.00E-06 | 3.3      | No  |
| 12 | rs3184504  | T | C | 6.00E-06 | 1.08     | No  |
| 12 | rs10774624 | G | A | 7.00E-09 | 1.09     | No  |
| 12 | rs3794271  | G | A | 4.00E-06 | 3.2      | No  |
| 12 | rs12831974 | C | T | 6.00E-06 | 1.27     | No  |
| 13 | rs9557321  | C | T | 6.00E-08 | 1.73     | No  |
| 13 | rs9603612  | G | C | 0        | 1.098901 | No  |
| 13 | rs9603616  | C | T | 0        | 1.1      | Yes |
| 13 | rs4942242  | T | C | 2.00E-07 | 0.13     | No  |
| 13 | rs9604529  | G | A | 7.00E-07 | 0.35     | No  |
| 13 | rs3790022  | A | G | 1.00E-06 | 1.4925   | No  |
| 14 | rs2582532  | C | T | 5.00E-08 | 1.18     | Yes |
| 14 | rs7155603  | G | A | 1.00E-07 | 1.16     | No  |
| 14 | rs3783637  | C | T | 2.00E-06 | 1.1      | No  |
| 14 | rs17118552 | G | A | 2.00E-07 | 17.19    | No  |
| 14 | rs1624005  | G | A | 7.00E-06 | 2.59     | No  |
| 14 | rs7141276  | A | G | 2.00E-06 | 0.37     | No  |
| 14 | rs2841277  | T | C | 0        | 1.15     | No  |
| 14 | rs1957895  | G | T | 4.00E-07 | 1.09     | No  |
| 14 | rs3783782  | A | G | 2.00E-09 | 1.14     | Yes |
| 14 | rs1950897  | T | C | 8.00E-11 | 1.1      | Yes |
| 15 | rs1914816  | A | G | 7.00E-07 | 0.87     | No  |
| 15 | rs1898036  | C | T | 2.00E-07 | 7.73     | No  |
| 15 | rs7164176  | G | A | 5.00E-07 | 0.28     | No  |
| 15 | rs17374222 | A | C | 2.00E-06 | 1.13     | No  |
| 15 | rs8026898  | A | G | 0        | 1.15     | Yes |
| 15 | rs12901682 | A | C | 4.00E-08 | 135.02   | No  |
| 15 | rs8032939  | C | T | 0        | 1.13     | Yes |
| 15 | rs6496667  | A | C | 1.00E-06 | 1.09     | No  |

|    |            |   |    |          |       |     |
|----|------------|---|----|----------|-------|-----|
| 16 | rs6500395  | C | T  | 6.00E-07 | 2.2   | No  |
| 16 | rs2280381  | T | C  | 2.00E-06 | 1.12  | No  |
| 16 | rs13330176 | A | T  | 9.00E-09 | 1.12  | Yes |
| 16 | rs16973500 | T | NA | 9.00E-06 | 0.24  | No  |
| 16 | rs7404928  | T | C  | 4.00E-06 | 1.08  | No  |
| 16 | rs4780401  | T | G  | 9.00E-09 | 1.09  | Yes |
| 17 | rs72634030 | A | C  | 2.00E-09 | 1.12  | No  |
| 17 | rs2872507  | A | G  | 9.00E-07 | 1.1   | No  |
| 17 | rs1877030  | C | T  | 2.00E-08 | 1.09  | No  |
| 17 | rs12601925 | G | A  | 6.00E-09 | 2.15  | Yes |
| 18 | rs2469434  | C | T  | 9.00E-10 | 1.07  | Yes |
| 18 | rs16977065 | T | C  | 1.00E-07 | 33.72 | No  |
| 18 | rs2847297  | G | A  | 2.00E-08 | 1.1   | No  |
| 18 | rs8083786  | G | A  | 0        | 1.14  | Yes |
| 18 | rs6506569  | T | C  | 7.00E-06 | 1.98  | No  |
| 18 | rs2002842  | A | C  | 6.00E-06 | 1.15  | No  |
| 18 | rs1943199  | T | G  | 2.00E-08 | 1.94  | No  |
| 19 | rs7258015  | C | T  | 3.00E-08 | 1.18  | No  |
| 19 | rs1273516  | A | G  | 9.00E-07 | 4.26  | No  |
| 19 | rs1543922  | T | C  | 3.00E-07 | 34.48 | No  |
| 19 | rs34536443 | G | C  | 0        | 1.46  | No  |
| 20 | rs4810485  | G | T  | 8.00E-09 | 0.91  | No  |
| 20 | rs4239702  | C | T  | 0        | 1.13  | Yes |
| 20 | rs6138892  | C | T  | 3.00E-07 | 10.93 | No  |
| 20 | rs6026990  | A | T  | 6.00E-07 | 0.63  | No  |
| 21 | rs2075876  | A | G  | 4.00E-09 | 1.18  | No  |
| 21 | rs73194058 | C | A  | 3.00E-08 | 1.13  | Yes |
| 21 | rs2837960  | G | T  | 2.00E-06 | 1.05  | No  |
| 21 | rs8133843  | A | G  | 3.00E-09 | 1.08  | Yes |
| 21 | rs11203203 | A | G  | 4.00E-06 | 1.11  | No  |
| 21 | rs1893592  | A | C  | 1.00E-11 | 1.11  | No  |
| 22 | rs1043099  | C | G  | 7.00E-09 | 1.19  | No  |
| 22 | rs3218251  | A | T  | 6.00E-06 | 1.08  | No  |
| 22 | rs743777   | G | A  | 1.00E-06 | 1.09  | No  |
| 22 | rs909685   | A | T  | 0        | 1.13  | Yes |
| 22 | rs2283790  | G | A  | 2.00E-11 | 1.22  | No  |
| 22 | rs11089637 | C | T  | 2.00E-09 | 1.08  | Yes |
